# Supplementary material for: Intermediate Care in Denmark – Bull’s Eye or Off Target? A Qualitative Study of Healthcare Without Healthcare Mandate and Diverging Practices in Temporary Stays
Source: Research Square preprint supplement (doi:10.21203/rs.3.rs-6629047/v1), 2025-05-16
Supplement: Supplementary file 1 [file b53d98b60fdc4c49a84c319b.docx]

**Semi-structured interview – interview with managers from Temporary Stays**

**Purpose of the interview**

To understand the working area of Temporary Stays i.e the task of managing a Temporary Stay in the municipal healthcare system – what does it mean to lead such a unit? My questions aim to understand how you organize your work in relation to the task at hand: including patient groups and care needs, staff distribution, professional backgrounds and competencies, priorities, and the use of management tools to create coherent patient pathways in Temporary Stays (TS).

**The role and function of the manager**

• Can you start by telling me a bit about yourself, your professional background, and your role here – what is your managerial function and what does it involve? (responsibility for / initiating actions)

• What kind of organization are you managing here? What would I see if I walked around this place during a typical day or week?

• What aspects of the organization would you like to influence, and what are you actually able to influence? (patient pathways, work environment, quality)

**Strategy – direction**

• What do you want to achieve with the unit in 3–5 years (e.g., developing competencies, stabilizing processes)?

• What implications does this have for the choice of staff and professional groups, processes, structures? How does this manifest in your current prioritization and workarounds?

**Structure and processes**

• Do you have any structures or management tools in your daily operations and interactions with the employees? i.e. Forums, meetings, weekly or daily triage, prioritization tools, communication and coordination methods?

• What types of information flow, processes, and work routines are necessary to meet your goals?

**Employees**

• Which professions and skill sets are needed here?

• How should they work differently in relation to the patient – what are their tasks?

• Is there a designated care coordinator responsible for the patient journey?

• How is the division of labor structured between staff to make sense for both patients and shift teams?

• How do you work with development of competence among employees?

• Do you train and upskill employees internally/externally?

• How do the different professions work together around the patient?

• How is staff retention and recruitment?

• What do you perceive as the biggest threat to staff well-being here?

**Health legislation vs. social services legislation**

• What is the legislative framework or jurisdiction you adhere to?

• What impact does legislation have on your practice and the care you can offer patients?

• Prompts: possibilities and limitations

• Prompts: influence on quality and what you are able to “offer”, how it shapes daily oppportunities to act

**Patient pathways – the core work area**

• How would you describe the patients you admit here – who are they, what are their conditions like, length of stay, readmissions? (illness profiles, socio-demographic profile of the municipality)

• In terms of helping these patients, what demands do they place on the organization – what must the TS unit be capable of in order to meet their needs? (competence, professionalism, skills, facilities)

• What do the patients require – treatment, care, diagnostics, etc.?

• (Given that facilities are largely different from a hospital) How do you “organize” the patients within the unit?

• Are they arranged physically in a way that supports work processes (e.g., in different wards)?

• What do you consider the greatest threat to the patient pathways you aim to offer here?

• How is professional development supported here – skills and competencies? Can someone just walk in and start working, or is specific upskilling required? Does this vary across professional groups?
