# Supplementary material for: Intermediate Care in Denmark – Bull’s Eye or Off Target? A Qualitative Study of Healthcare Without Healthcare Mandate and Diverging Practices in Temporary Stays
Source: Research Square preprint supplement (doi:10.21203/rs.3.rs-6629047/v1), 2025-05-16
Supplement: Supplementary file 2 [file b72253910648816ce60d8397.docx]

#

**Focus group: history workshop – with healthcare employees from Temporary Stays**

**Introduction in plenary:**

The history workshop is a useful method for uncovering an organization’s history in the form of changes and events that have had significance for you and your work situation. These changes and events may be personal and/or general for the department.

**1)** Think back as far as your memory goes and consider which significant changes/events have occurred in and around the department from up until today.

- Write **one** change/event on each of the provided Post-its, preferably including **month and year**.
- You may write as many events as you like, but only one per post-it.

**2)** Think back as far as your memory goes and consider which significant changes/events have occurred in **work, organization, and management** in the department.

- Write **one** change/event on each of the provided Post-its, preferably including **month and year**.
- You may write as many events as you like, but only one per Post-it.

**3)** Think back as far as your memory goes and consider which significant changes/events have occurred in and around **patients, patient mix, and patient complexity** in the department from.

- Write **one** change/event on each of the provided post-its, preferably including **month and year**.
- You may write as many events as you like, but only one per post-it.
